# Supplementary material for: Spatial variation in diatom abundance and composition in Biwase Bay and Hamanaka Bay (Eastern Hokkaido, Japan), with reference to environmental features
Source: PeerJ. 2022 Jul 27;10:e13705. doi: 10.7717/peerj.13705 (PMC9338754; doi:10.7717/peerj.13705)
Supplement: Supplemental Information 1 [file peerj-10-13705-s001.xlsx]

## Sheet: Raw data
Supplementary data: Raw data of water quality and nutrient in each station.
Area	Station	Water temperature (℃)	Salinity (ppt )	Chl. a	aCDOM(443)	NO2 (umol/L)	NO3 (umol/L)	NH4 (umol/L)	PO4 (umol/L)	SiO2 (umol/L)
Area1	St.1	11.443	25.116	0.684826	1.32704	0.0798	0.5864	0.426	0.4094	30.702
	St.2	9.169	29.784	1.03523	0.658796	0.053	0.4094	0.144	0.3838	15.638
Area2	St.3	10.166	31.07	1.66219	0.20388	0.0126	0.1047	0.01	0.4219	7.413
	St.4	10.153	30.931	1.88486	0.243178	0.0264	0.0953	0.01	0.3894	7.284
	St.5	8.423	31.472	2.29502	0.135914	0.1017	0.5563	0.623	0.5822	8.076
Area3	St.6	10.048	31.057	2.33018	0.114436	0.0134	0.0908	0.01	0.3385	6.478
	St.7	10.269	31.112	1.81454	0.1252	0.0194	0.2204	0.01	0.3656	9.305
	St.8	10.291	31.07	1.38094	0.40939	0.0478	0.3605	0.03	0.4488	10.749
Area4	St.9	8.564	31.565	2.27159	0.120696	0.0549	0.949	0.143	0.4332	7.347
	St.10	7.374	31.685	2.22471	0.141082	0.1443	2.4486	0.461	0.7045	10.639
	St.11	7.873	31.599	1.90829	0.0915949	0.1059	1.9933	0.678	0.662	8.494

## Sheet: Table 1
Table 1. One-way ANOVA tests of significance for each environmental variable (water temperature, salinity, Chl a, CDOM), nutrients (total amount of nitrite and nitrate, ammonium, phosphate, silica) and counted diatom cells, followed by Tukey's HSD.
	F value	df	p
Temperature	4.4	3	0.0487 *
Salinity	5.181	3	0.0338 *
Chlorophyll a	6.337	3	0.0209 *
aCDOM (443)	9.026	3	0.00838 **
Nitrite and nitrate	7.93	3	0.0118 *
Ammonium	1.383	3	0.325
Phosphate	2.749	3	0.122
Silica	6.503	3	0.0196 *
Diatom cells	173.9	3	1.27e-07 ***
Signif. codes: 0 ‘***’ 0.001 ‘**’ 0.01 ‘*’ 0.05 ‘.’ 0.1 ‘ ’

## Sheet: Table 2
Table 2: List of diatom genera observed by light microscope and cell numbers (cells/L) in four stations (St.2, 4, 7, and 10) representing each area of Biwase Bay and Hamanaka Bay.
		Biwase Bay		Hamanaka Bay
Name of diatom genera		Area 1	Area 2	Area 3	Area 4
		(St. 2)	(St. 4)	(St. 7)	(St. 10)
Centric	Actinocyclus		66.6667		66.6667
	Actinoptychus	666.667	66.6667	333.333	166.667
	Arachnoidiscus		33.3333
	Biddulphia		66.6667
	Ehrenbergia	1700	933.333	100	466.667
	Hyalodiscus	866.667			166.667
	Melosira	33.3333
	Odontella	366.667
	Paralia	2466.67	1166.67	500	2233.33
	Thalassiosira	1533.33	2666.67	3366.67	8466.67
	Triceratium		33.3333
Pennate	Achnanthes	33.3333
	Amphora	266.667	766.667		100
	Cocconeis	123667	37266.7	200	733.333
	Cosmioneis		66.6667
	Cylindrotheca		133.333
	Delphineis	300	2766.67	1700	1800
	Diatoma		133.333
	Diploneis	100	1500	66.6667	66.6667
	Entomoneis		233.333
	Fallacia	500	4300		33.3333
	Fragilaria		33.3333
	Gyrosigma	66.6667	66.6667	33.3333	100
	Hyalosynedra	66.6667
	Licmophora		166.667
	Navicula	4600	9233.33	1266.67	1066.67
	Nitzschia	1666.67	633.333	100	100
	Planothidium	566.667	1333.33
	Pleurosigma	66.6667	33.3333		500
	Rhaphoneis	33.3333	1766.67	100	33.3333
	Surirella	33.3333
	Tabularia		233.333
	Trachyneis		33.3333
	Tryblionella		33.3333		33.3333
Subtotal of diatom cells (/L)		139600	65766.7	7766.67	16133.3
Number of Genera occurred		21	28	11	17
